# Supplementary material for: Green synthesis of carbon dots by celery leaves for use as fluorescent paper sensors for the detection of nitrophenols
Source: Royal Society of Chemistry journal article supplement (doi:10.1039/c9nj05285b), 2019-11-25
Supplement: c9nj05285b1.pdf [file c9nj05285b1.pdf]

## Supplementary Information

### Green synthesis of carbon dots by celery leaves and used as fluorescent paper sensors for detection of nitrophenol

YaoYao Qu<sup>a</sup>, Liying Yu<sup>a</sup>, Baoya Zhu<sup>a</sup>, Fang Chai<sup>\*a</sup> and Zhongmin Su<sup>\*b</sup>

<sup>a</sup> Key Laboratory of Photochemical Biomaterials and Energy Storage Materials, Colleges of Heilongjiang Province, Key Laboratory for Photonic and Electronic Bandgap Materials, Ministry of Education, College of Chemistry and Chemical Engineering, Harbin Normal University, Harbin 150025, P. R. China.

<sup>b</sup> School of Chemistry and Environmental Engineering, Changchun University of Science and Technology, Changchun 130022, People's Republic of China.

\* Corresponding author. E-mail: [fangchai@gmail.com](mailto:fangchai@gmail.com) and [zmsu@nenu.edu.cn](mailto:zmsu@nenu.edu.cn)

### Experiment:

#### MTT

To evaluate the cytotoxicity of the CDs, the viability of the HEPG-2 cells was assessed by measuring their ATP activity after exposure to the CDs. 100  $\mu\text{L}$  of the cell suspensions in cell media at a concentration of  $2 \times 10^5$  cells/mL were seeded in 96-well plates and allowed to attach overnight. After removal of the cell media, the wells were washed twice with HBSS-HEPES buffer (pH=7.4) and then 100  $\mu\text{L}$  of the tested CDs at the relevant concentrations were added. After incubation, the reagent was added to each well to assess the ATP activity.

#### Cell Culture and Imaging

HEPG-2 cells were cultured in Dulbecco's Modified Eagle's Medium supplemented with 10% fetal bovine serum, 100  $\text{mg} \cdot \text{mL}^{-1}$  penicillin, and 100  $\mu\text{g} \cdot \text{mL}^{-1}$  streptomycin in a 5%  $\text{CO}_2$ , water saturated incubator at 37 °C and then were seeded in

a 12-well culture plate for one night before the cell imaging experiments. For living cell imaging experiments, some of the cells were incubated with  $0.019 \text{ g}\cdot\text{mL}^{-1}$  of probe for 30 min at  $37^\circ\text{C}$ , washed three times with buffer, and then imaged.

## Results and discussion:

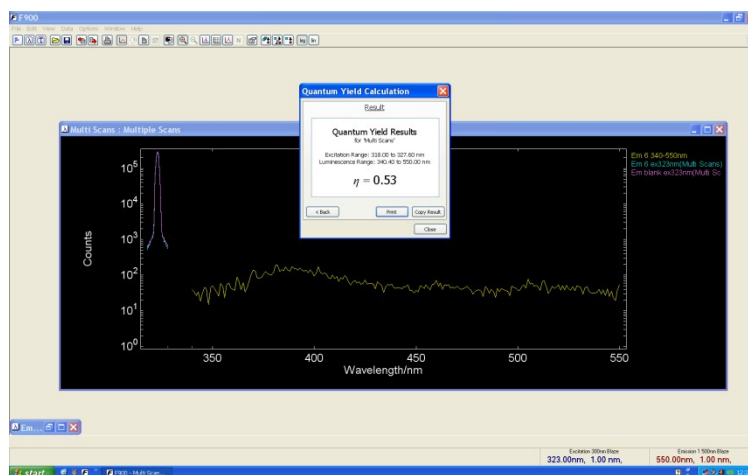

Fig. S1. Fluorescence quantum yield of CDs (Fluorolog-3)

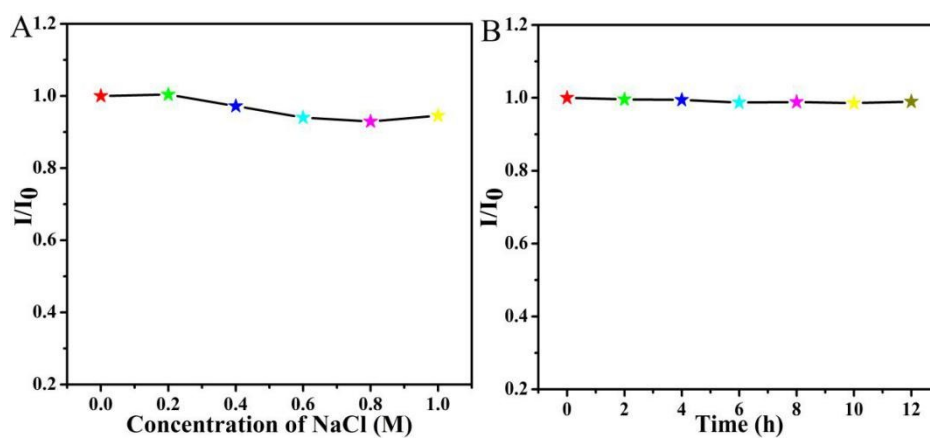

Fig. S2. (A) Dependent fluorescent intensity ratio ( $I/I_0$ ) of the CDs with the different condition of high NaCl concentration and (B) storage time.

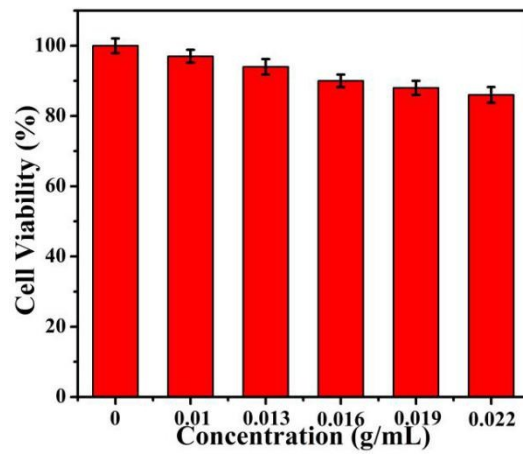

Fig. S3. Cell viability of HEPG-2 cells after incubation with CDs for 24 h by MTT assay.

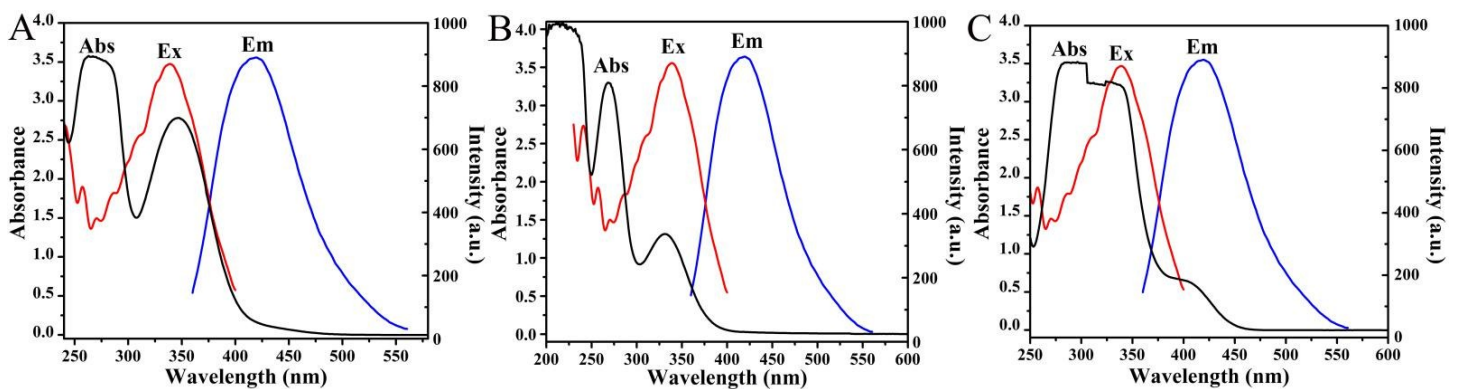

Fig. S4. The absorption spectra of (A) 2-NP, (B) 3-NP and (C) 4-NP and fluorescence emission spectrum of CDs.

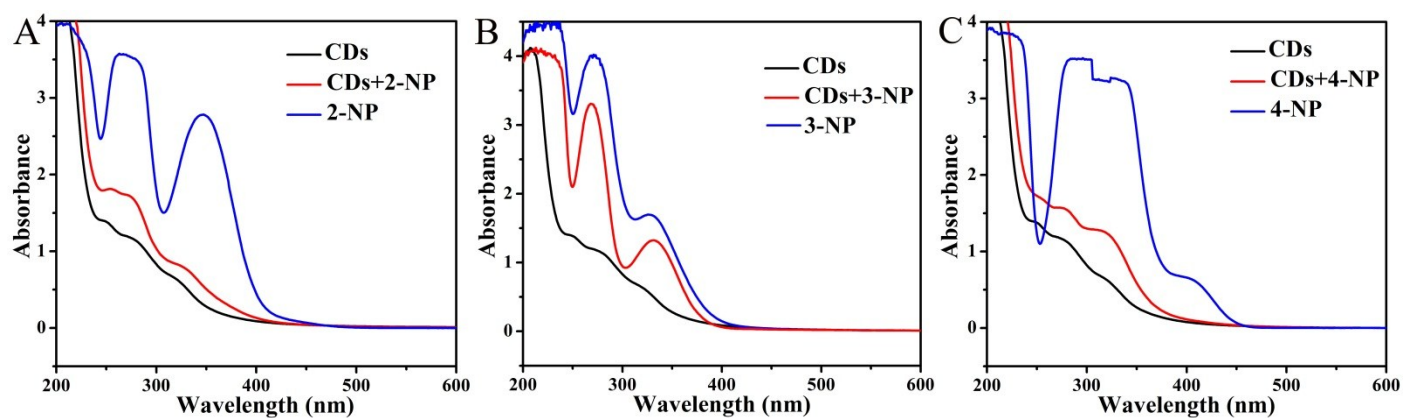

Fig. S5. (A) UV-vis absorption spectra of CDs, CDs+2-NP, 2-NP. (B) UV-vis absorption spectra of CDs, CDs+3-NP, 3-NP. (C) UV-vis absorption spectra of CDs, CDs+4-NP, 4-NP.

**Table S1.** Comparison values between proposed sensor and published papers for the detection of 2-NP, 3-NP and 4-NP.

| Systems                                                        | Detection Limit    |      |                    | Detection Method          | Reference |
|----------------------------------------------------------------|--------------------|------|--------------------|---------------------------|-----------|
|                                                                | 2-NP               | 3-NP | 4-NP               |                           |           |
| Polymer carbon dots                                            |                    |      | 0.26 $\mu\text{M}$ | Fluorescence              | [1]       |
| Carbon dots                                                    | 1.06 $\mu\text{M}$ |      | 0.5 $\mu\text{M}$  | Fluorescence/colorimetric | [2]       |
| (tmaePcCo/CNT)n films                                          |                    |      | 0.2 $\mu\text{M}$  | Electrochemical sensor    | [3]       |
| Pt-decorated CNT nanocomposites                                | 2.19 mM            |      |                    | Chemical sensor           | [4]       |
| Graphene-chitosan composite film                               | 200 nM             |      | 80 nM              | Voltammetric              | [5]       |
| A glassy carbon electrode modified with reduced graphene oxide |                    |      | 42 $\mu\text{M}$   | Electrochemistry          | [6]       |
| CDs                                                            | 39 nM              | 43nM | 26 nM              | Fluorescence              | This Work |

## References

- [1] L. Han, S. J. Liu, J. Y. Liang, Y. J. Ju, N. B. Li and H. Q. Luo, *J. Contam. Hydrol.* 2019, **362**, 45-52.
- [2] G. J. Ren, M. Y. Tang, F. Chai and H. B. Wu, *Eur. J. Inorg. Chem.* 2018, **23**, 153-158.
- [3] H. Wu, L. X. Guo, J. L. Zhang, S. L. Miao, C. Y. He, B. Wang, Y. Q. Wu and Z. M. Chen, *Sens. Actuators B: Chem.* 2016, **230**, 539-566.
- [4] A. Umar, S. H. Kim, R. Kumar, H. Algarni and M. Al-Assiri, *Ceram. Int.* 2016, **42**, 9257-9263.
- [5] P. H. Deng, Z. F. Xu and J. H. Li, *Microchim. Acta.* 2014, **181**, 1077-1084.
- [6] P. Wiench, B. Grzyb, Z. González, R. Menéndez, B. Handke and G. Gryglewicz, *J. Electroanal. Chem.* 2017, **787**, 80-87.
